# Supplementary material for: Gene expression in metastatic breast cancer—patterns in primary tumors and metastatic tissue with prognostic potential
Source: Front Mol Biosci. 2024 Feb 21;10:1343979. doi: 10.3389/fmolb.2023.1343979 (PMC10916684; doi:10.3389/fmolb.2023.1343979)
Supplement: Supplementary file 1 [file Table2.xlsx]

## Sheet: Analysis details
	Supplementary material Table 2, .xslx
	Output from differential GEX analysis of gene expression comparing PTs to LNMs, PTs to DMs, and LNMs to DMs, as well as methodological details. Adjustment of p-values was performed by the FDR method, creating q-values. The data were generated by linear models using limma.
	Analysis details
	Differential gene expression analysis using limma
	Performed on cohort subsets including only the sites compared. Stratified on site.
	p-value adjustments were made by false discovery rate (FDR)

## Sheet: DM compared to PT
	logFC	AveExpr	t	P.Value	adj.P.Val	B
SFRP2	-4.04884	-1.04652	-15.5166	3.80427e-36	2.88364e-33	71.4374
ADAM12	-2.12349	-1.48035	-12.7819	9.99374e-28	3.78763e-25	52.3338
MMP3	-2.29315	-3.71562	-12.5189	6.40797e-27	1.61908e-24	50.5022
WNT2	-1.37125	-3.20534	-10.705	1.99732e-21	3.78492e-19	38.036
THBS4	-2.49242	-1.16406	-9.52825	5.61059e-18	8.50566e-16	30.2186
KRT5	-2.84076	-4.43641	-9.32009	2.21361e-17	2.42068e-15	28.8685
GREM1	-2.12486	-2.38282	-9.31859	2.23546e-17	2.42068e-15	28.8589
KRT14	-3.44267	-2.39141	-9.29759	2.56599e-17	2.43127e-15	28.7233
BNC2	-1.40939	-3.52826	-8.93396	2.73867e-16	2.30657e-14	26.3956
BMP2	1.5262	-4.78617	8.16741	3.53179e-14	2.6771e-12	21.6238
GJB2	-1.6516	-2.81462	-8.11624	4.85082e-14	3.34266e-12	21.3125
IRX1	-2.55365	-4.39749	-7.82674	2.86788e-13	1.81154e-11	19.5703
CYP4F3	1.84819	-6.40906	7.75322	4.48062e-13	2.43283e-11	19.1331
MMP14	-1.09511	0.571243	-7.74179	4.8014e-13	2.43283e-11	19.0653
GAS1	-1.35817	-2.20751	-7.74135	4.81432e-13	2.43283e-11	19.0627
COL6A3	-1.38761	2.11328	-7.60764	1.07717e-12	5.10311e-11	18.2739
MMP7	-2.27311	-3.32592	-7.52888	1.72509e-12	7.69186e-11	17.8128
FOS	-1.66069	-0.509867	-7.40097	3.68614e-12	1.55228e-10	17.0696
ISM1	-1.34554	-3.40697	-7.37534	4.28845e-12	1.71087e-10	16.9215
HBB	2.53517	0.404749	7.34231	5.20957e-12	1.97443e-10	16.7312
CCND2	-0.821521	-2.54006	-7.21955	1.06925e-11	3.85948e-10	16.0279
MYC	-1.08053	0.59381	-7.1434	1.66464e-11	5.73545e-10	15.5952
TNFAIP6	-1.04036	-1.51707	-7.01517	3.48717e-11	1.14925e-09	14.8726
PTGER3	-1.58538	-1.63687	-6.9474	5.13885e-11	1.62302e-09	14.4939
FAP	-1.07717	-1.96799	-6.92471	5.84821e-11	1.77318e-09	14.3677
BMP5	1.40357	-4.92763	6.91171	6.2973e-11	1.83591e-09	14.2954
JUN	-0.9419	0.919	-6.86272	8.3164e-11	2.33475e-09	14.0239
TNN	-1.1057	-4.20149	-6.84381	9.25621e-11	2.50579e-09	13.9194
NCAM1	1.49687	-3.29155	6.80533	1.15027e-10	3.00657e-09	13.7073
MMP11	-1.66897	0.59717	-6.6278	3.10527e-10	7.84599e-09	12.7387
KRT17	-2.16606	-2.2043	-6.58752	3.88167e-10	9.4913e-09	12.5211
VCAN	-0.925947	2.13536	-6.56489	4.39852e-10	1.0419e-08	12.3993
SFRP4	-1.57506	-0.111039	-6.46845	7.47173e-10	1.71623e-08	11.8831
IBSP	2.26882	-2.62414	6.4142	1.00445e-09	2.23934e-08	11.5949
TIGIT	-1.03763	-4.07113	-6.30186	1.8448e-09	3.99531e-08	11.0032
NR4A1	-1.30794	-1.08196	-6.18731	3.40524e-09	7.16993e-08	10.4071
IL7R	-1.08932	-3.21583	-6.17748	3.58799e-09	7.35052e-08	10.3563
NR4A3	-1.00665	-4.49759	-6.12214	4.81087e-09	9.59642e-08	10.0712
FLNC	-0.824302	-3.87612	-5.97267	1.05335e-08	2.04729e-07	9.31007
LEP	-1.1828	-6.20626	-5.84167	2.07188e-08	3.92621e-07	8.65378
IL6	-0.939503	-3.50813	-5.82784	2.22399e-08	4.0871e-07	8.58509
FGF10	-1.51907	-4.58493	-5.8243	2.26462e-08	4.0871e-07	8.56754
ZFPM2	-0.693813	-5.08584	-5.78823	2.72258e-08	4.79933e-07	8.38901
CAV1	-0.831569	-1.34295	-5.62634	6.16452e-08	1.06198e-06	7.59751
THY1	-0.80366	0.390977	-5.61391	6.55949e-08	1.10491e-06	7.53741
LEPR	1.02876	-2.35178	5.58894	7.4288e-08	1.22414e-06	7.41699
TCF4	-0.597963	-0.956095	-5.5062	1.11918e-07	1.80498e-06	7.02066
DCN	-1.14216	2.59788	-5.41869	1.71858e-07	2.71392e-06	6.60623
THBS2	-0.954642	1.23525	-5.35081	2.3891e-07	3.69579e-06	6.28818
SFRP1	-1.61194	-1.56663	-5.33307	2.60267e-07	3.94566e-06	6.20555
CDH2	1.08027	-3.85458	5.30686	2.95257e-07	4.38832e-06	6.08385
CD8B	-0.751451	-3.80126	-5.27059	3.51323e-07	5.12121e-06	5.91616
CD8A	-0.810478	-2.53341	-5.26659	3.58098e-07	5.12147e-06	5.89775
CXCL9	-1.2377	-1.60579	-5.22764	4.31176e-07	6.01402e-06	5.71871
SOCS3	-0.784526	-1.40483	-5.22512	4.36374e-07	6.01402e-06	5.70716
JAM2	-0.747122	-3.19025	-5.21798	4.51426e-07	6.11037e-06	5.67448
FOXP3	-0.667076	-4.66607	-5.14672	6.32158e-07	8.4066e-06	5.3501
PLAT	-1.0793	0.26642	-5.1026	7.7746e-07	1.01606e-05	5.15094
TPSAB1	-1.4116	0.270012	-5.09009	8.24256e-07	1.05896e-05	5.09469
FZD7	-0.730888	-1.94226	-5.06812	9.13071e-07	1.15351e-05	4.99624
GADD45B	-0.539683	-0.451491	-5.06035	9.46671e-07	1.17636e-05	4.96148
CDH3	-1.14488	-3.73421	-5.00509	1.22263e-06	1.49476e-05	4.7155
CPA3	-1.1736	-2.89909	-4.97133	1.42809e-06	1.71824e-05	4.56623
CCL5	-0.826938	-1.73778	-4.95692	1.52562e-06	1.80691e-05	4.50276
CD27	-0.894644	-3.17576	-4.88461	2.12086e-06	2.47325e-05	4.18648
FSTL1	-0.707486	1.44613	-4.84465	2.54058e-06	2.91782e-05	4.01324
EYA4	0.843762	-6.08298	4.65744	5.83564e-06	6.60212e-05	3.21675
PPP2R1A	-0.278587	1.83358	-4.65043	6.01738e-06	6.70761e-05	3.18742
AREG	-1.32707	-2.11077	-4.62565	6.70486e-06	7.36563e-05	3.08398
MYCN	1.00245	-4.54499	4.62227	6.80415e-06	7.36792e-05	3.06993
HLA.DRA	-0.543497	1.98055	-4.5576	9.0043e-06	9.61304e-05	2.80227
APOD	-1.61727	1.62413	-4.533	1.00094e-05	0.000105376	2.70125
FGF18	-0.580935	-4.08098	-4.50568	1.12521e-05	0.000116836	2.58957
ZEB1	-0.515898	-0.656602	-4.46767	1.32296e-05	0.000135514	2.43517
WIF1	1.40048	-5.88851	4.43246	1.53566e-05	0.000155204	2.29307
CDC25A	0.640599	-4.08816	4.41251	1.67044e-05	0.000166604	2.21294
PRKCA	0.561592	-3.49847	4.4052	1.7226e-05	0.000169576	2.18365
CCL4	-0.579559	-2.42387	-4.39033	1.83349e-05	0.000178178	2.12425
IDO1	-0.912341	-3.80754	-4.27134	3.00437e-05	0.00028656	1.65463
CXCR6	-0.630046	-4.17068	-4.26973	3.02438e-05	0.00028656	1.64833
ICAM1	-0.47737	-1.01594	-4.2415	3.39507e-05	0.000317711	1.53854
ITGB3	0.779365	-3.73986	4.2371	3.45675e-05	0.000319538	1.52145
CXCL13	-1.21707	-3.26111	-4.23342	3.50904e-05	0.000320464	1.5072
FGFR4	1.01288	-3.48731	4.21894	3.72225e-05	0.000335889	1.45123
TYMP	-0.436272	1.43371	-4.20585	3.92573e-05	0.000348876	1.40074
BCL2L1	0.289951	0.598664	4.20258	3.97831e-05	0.000348876	1.38812
FOXC2	0.7586	-4.35537	4.20097	4.00425e-05	0.000348876	1.38195
TGFB3	-0.633709	0.146635	-4.17657	4.41998e-05	0.000380721	1.28829
CHI3L1	-1.1285	-3.4942	-4.16926	4.55236e-05	0.000387718	1.26032
RASGRF2	-0.543948	-2.97592	-4.16578	4.61673e-05	0.000388831	1.24701
RASGRP1	-0.744338	-3.10067	-4.15608	4.80069e-05	0.000399882	1.20998
IKZF3	-0.712595	-3.25833	-4.13919	5.13796e-05	0.000423323	1.14566
NSD1	0.287945	-0.179549	4.13334	5.25982e-05	0.000428704	1.12345
MME	-0.733382	-2.31545	-4.12955	5.34045e-05	0.000430645	1.10905
PGR	-1.35608	-2.87771	-4.11497	5.66101e-05	0.000451689	1.05385
FGF2	-0.735565	-2.20635	-4.08994	6.25505e-05	0.000493888	0.959411
HOXA7	-0.702306	-5.25108	-4.08227	6.44841e-05	0.000503907	0.930608
VIT	0.803693	-6.14972	4.0426	7.54431e-05	0.00058353	0.78219
IL2RB	-0.589342	-4.4463	-4.02756	8.00448e-05	0.000612868	0.726241
LTBP1	0.626831	0.0284604	3.98066	9.61725e-05	0.000728987	0.552911
LPL	-0.78247	-2.57863	-3.96776	0.000101121	0.000758905	0.50557
GZMA	-0.538158	-3.44985	-3.96345	0.000102829	0.00076416	0.489765
FLT3	-0.624955	-4.54068	-3.94092	0.000112209	0.000825774	0.407433
EIF2AK3	0.255739	-1.70517	3.88845	0.000137312	0.000992004	0.217215
TIS	-0.502247	6.33654	-3.88825	0.000137415	0.000992004	0.216507
SERPINB5	-1.07345	-3.97714	-3.87608	0.000143963	0.00102947	0.172685
CCL21	-0.925835	-2.95085	-3.86772	0.000148626	0.00105288	0.142681
LAMC2	-0.837474	-2.31503	-3.85854	0.000153917	0.00107047	0.109767
KIT	-0.818325	-1.95969	-3.85851	0.000153933	0.00107047	0.109667
RASAL1	0.661151	-6.07116	3.85242	0.000157538	0.00108558	0.087892
HGF	0.569643	-4.38189	3.82409	0.000175398	0.00119776	-0.0130949
CXCL10	-0.845597	-1.87683	-3.81504	0.000181494	0.00122832	-0.045203
KRT6B	-0.910453	-5.35675	-3.79081	0.000198825	0.00133371	-0.130884
FGFR3	0.908805	-1.70642	3.78419	0.000203825	0.00135526	-0.154207
MAPT	-0.975541	-1.29102	-3.71167	0.000266987	0.00175979	-0.407406
HNF1A	0.5708	-4.93925	3.70842	0.000270212	0.00176569	-0.418656
CDKN1C	-0.519185	-2.18276	-3.69458	0.000284358	0.00184225	-0.466457
IGF1	-0.564468	-2.75003	-3.68672	0.000292694	0.00188018	-0.493513
IGF1R	-0.713981	-0.469148	-3.65827	0.000324865	0.00204764	-0.591115
PDCD1LG2	-0.391733	-3.58616	-3.65659	0.000326865	0.00204764	-0.596859
PDL2	-0.391733	-3.58616	-3.65659	0.000326865	0.00204764	-0.596859
PD1	-0.446832	-4.68579	-3.60123	0.000399647	0.00248306	-0.784765
SOX10	-1.90282	-7.27554	-3.55159	0.000477653	0.00294359	-0.951149
RNASE2	0.536457	-5.49775	3.5454	0.000488323	0.00298507	-0.971745
MEOX2	-0.641485	-4.92701	-3.53644	0.000504166	0.00305726	-1.00151
TWIST2	-0.447942	-6.27975	-3.52109	0.000532449	0.00320314	-1.05236
CCR5	-0.425272	-4.35371	-3.49988	0.000573972	0.00342576	-1.12228
PTCH1	0.485495	-3.92211	3.49684	0.000580159	0.00343563	-1.13226
CKB	0.742705	-1.61972	3.47832	0.000619276	0.00363885	-1.19297
LIFR	0.554723	-1.89142	3.46995	0.000637768	0.00369332	-1.22033
GATA4	0.747774	-6.53125	3.46971	0.000638291	0.00369332	-1.2211
BTG2	-0.538746	1.90905	-3.44669	0.000691858	0.0039511	-1.296
FGL2	-0.466047	-2.02758	-3.44611	0.000693267	0.0039511	-1.29789
ID2	0.352369	-0.960408	3.44123	0.000705173	0.00398896	-1.31371
VIM	-0.410799	4.83542	-3.43601	0.00071813	0.00403217	-1.33062
ID1	0.488439	-2.0985	3.42682	0.000741453	0.00413251	-1.3603
PDGFRB	-0.489274	-0.409193	-3.42433	0.000747903	0.00413803	-1.36834
CD274	-0.366539	-3.78617	-3.39812	0.000818979	0.00440959	-1.45258
PDL1	-0.366539	-3.78617	-3.39812	0.000818979	0.00440959	-1.45258
AGT	0.84605	-2.8778	3.39614	0.000824591	0.00440959	-1.45891
ELK3	-0.317432	-1.58405	-3.39571	0.000825834	0.00440959	-1.46031
MS4A2	-0.632755	-2.27444	-3.39562	0.000826071	0.00440959	-1.46058
SPRY1	-0.451754	-1.35166	-3.38038	0.000870623	0.0045645	-1.50928
CACNA2D3	0.538968	-5.78288	3.37992	0.000872011	0.0045645	-1.51075
FBN1	-0.588129	-0.352661	-3.37953	0.000873156	0.0045645	-1.51197
CDKN2B	-0.426604	-2.95319	-3.34927	0.000968596	0.00502874	-1.60806
GHR	0.596775	-3.22333	3.3422	0.000992263	0.00511657	-1.63041
LRP2	-1.06086	-1.43335	-3.32731	0.00104385	0.00532024	-1.6773
BNIP3	0.3763	-1.13977	3.32676	0.0010458	0.00532024	-1.67903
EYA1	0.667235	-5.48781	3.29284	0.00117305	0.00592781	-1.78517
CD1E	-0.452361	-5.95793	-3.27699	0.00123731	0.00621114	-1.83443
AGTR1	-0.938344	-3.52057	-3.27185	0.00125884	0.00627763	-1.85035
FGF1	-0.471694	-5.5612	-3.26325	0.00129564	0.00634521	-1.87694
RBX1	-0.208308	0.556772	-3.26243	0.0012992	0.00634521	-1.87948
COL4A6	-0.355177	-4.80385	-3.26163	0.00130271	0.00634521	-1.88196
HOXB13	0.637418	-6.06759	3.25931	0.00131286	0.00634521	-1.88912
KAT2B	0.308582	-1.78796	3.25899	0.00131425	0.00634521	-1.8901
KLRK1	-0.454507	-3.9406	-3.25627	0.00132628	0.00636277	-1.8985
NUF2	0.42008	-4.12415	3.25097	0.00134997	0.0064357	-1.91483
LTB	-0.619161	-4.46322	-3.21888	0.001502	0.00711575	-2.01319
PLA2G2A	1.01057	-4.17358	3.21417	0.0015256	0.00718266	-2.02754
DTX1	-0.430754	-3.72778	-3.20392	0.00157818	0.00738431	-2.05873
PCK1	0.980249	-5.31236	3.19134	0.001645	0.00761255	-2.0969
WNT5A	-0.545645	-1.51364	-3.19097	0.00164704	0.00761255	-2.09804
RPS6KB2	0.261311	-1.62808	3.18286	0.0016915	0.00777067	-2.12253
RAD51C	0.261334	-1.93606	3.17476	0.00173707	0.00793193	-2.14698
CDKN1B	-0.412621	1.44494	-3.17185	0.00175373	0.00796004	-2.15575
RRM2	0.481125	-0.382275	3.16218	0.00181012	0.00814947	-2.18483
WNT5B	0.532997	-4.82052	3.16103	0.00181697	0.00814947	-2.1883
FXYD3	0.46283	1.60098	3.14087	0.00194038	0.00865181	-2.24865
SOX2	0.627893	-4.89698	3.0782	0.00237527	0.010529	-2.43401
TGFB2	-0.56166	-2.03342	-3.06505	0.00247721	0.010917	-2.47246
CDC14B	0.359525	-2.48364	3.05486	0.002559	0.0112123	-2.50217
F3	-0.465317	-2.36825	-3.05073	0.00259281	0.0112951	-2.51417
IL6R	0.366391	-2.25076	3.04493	0.0026411	0.0114397	-2.53103
HLA.DPA1	-0.383067	1.14008	-3.03948	0.00268711	0.011543	-2.54681
JAK1	-0.17322	1.47299	-3.03851	0.00269539	0.011543	-2.54963
PLA2G4F	0.511763	-4.21847	3.03555	0.00272079	0.0115863	-2.55819
DLL1	-0.371674	-2.59347	-3.01928	0.00286445	0.0121299	-2.60518
PIM1	-0.363462	-1.77465	-3.00088	0.00303523	0.0126448	-2.65801
GZMM	-0.403441	-5.68615	-3.00079	0.00303605	0.0126448	-2.65825
ITGAV	-0.265731	1.93975	-3.00079	0.00303608	0.0126448	-2.65826
HAPLN1	0.566957	-5.08691	2.99287	0.00311242	0.0128919	-2.6809
PIK3R1	-0.371397	0.0185518	-2.98765	0.00316374	0.0130333	-2.69581
SPRY4	0.343717	-2.3883	2.98142	0.00322603	0.0131551	-2.71357
GRB2	-0.267902	-0.877792	-2.98122	0.00322802	0.0131551	-2.71414
STC1	-0.667932	-3.14045	-2.97749	0.00326587	0.0132381	-2.72475
CFD	-0.559931	0.713379	-2.9736	0.00330575	0.0133285	-2.73581
OGN	-0.742674	-2.5958	-2.94763	0.00358357	0.0143524	-2.80924
PSMB9	-0.387026	0.183352	-2.94485	0.00361455	0.0143524	-2.81707
IL1R2	0.488501	-5.34888	2.94468	0.00361651	0.0143524	-2.81756
CCNA1	-0.36108	-6.56642	-2.93924	0.00367782	0.0145197	-2.83285
SELE	-0.438486	-4.07358	-2.93538	0.00372194	0.0146178	-2.84368
SKP2	0.219118	-2.66091	2.90526	0.00408332	0.0159544	-2.92784
INHBA	-0.53141	0.123117	-2.8998	0.00415214	0.0161401	-2.943
CLDN3	0.43569	-2.90165	2.89621	0.00419794	0.0162349	-2.95295
E2F1	0.359041	-2.89357	2.89001	0.0042782	0.0164613	-2.97012
CXCL12	-0.518836	-0.0568988	-2.88699	0.00431772	0.0165295	-2.97846
IL3RA	-0.26955	-1.963	-2.88435	0.00435272	0.0165797	-2.98578
MTOR	0.144163	-0.927891	2.88132	0.00439297	0.0166493	-2.99412
ACVRL1	-0.291427	-2.75258	-2.87121	0.00453014	0.0170838	-3.02197
BAMBI	0.626993	-1.00007	2.85025	0.00482694	0.018113	-3.07942
IL2RA	-0.399679	-4.97167	-2.83552	0.0050461	0.0188421	-3.11957
CHAD	1.06217	-3.37196	2.83154	0.00510674	0.0189751	-3.13036
GABRP	-0.899773	-2.34108	-2.81637	0.00534435	0.019761	-3.17144
TP53	-0.229684	-0.0129197	-2.79216	0.00574451	0.0211376	-3.23659
PSAT1	0.538437	-3.8472	2.7861	0.00584891	0.0214178	-3.25283
RNF103	0.215937	0.579664	2.78289	0.0059048	0.0214695	-3.2614
DDR2	-0.347422	-1.30638	-2.78204	0.00591968	0.0214695	-3.26367
XRCC3	0.259236	-2.79276	2.753	0.00644962	0.0232801	-3.34085
SERBP1	-0.161273	1.28124	-2.74904	0.00652523	0.0234414	-3.35134
SKA3	0.329123	-5.16736	2.74669	0.00657049	0.0234926	-3.35755
MDM2	0.307666	0.903626	2.74229	0.00665583	0.023686	-3.36915
TCEAL1	-0.357157	-1.41843	-2.72397	0.00702209	0.0248726	-3.41728
ACVR1C	-0.372514	-5.81294	-2.72124	0.00707818	0.0249547	-3.42442
NRXN3	0.479864	-4.84244	2.69081	0.0077319	0.0271332	-3.50365
KDR	0.301034	-2.64414	2.68692	0.00781923	0.0273133	-3.51371
AKT3	-0.350848	-1.37022	-2.67966	0.00798485	0.0277638	-3.53248
LRRC32	-0.345048	-2.08633	-2.67479	0.00809764	0.0280274	-3.54503
AXIN2	-0.356733	-3.23915	-2.66532	0.00832096	0.0286695	-3.56938
CCNE2	0.358172	-2.82683	2.65609	0.00854398	0.0292924	-3.59303
HLA.DMA	-0.250942	0.117872	-2.65466	0.00857903	0.0292924	-3.59669
NOTCH1	0.245576	-1.75744	2.63556	0.00905963	0.0307946	-3.64538
ANLN	0.425076	-1.09765	2.62911	0.00922728	0.0312245	-3.66174
COL9A3	-0.587096	-5.06453	-2.61031	0.00973193	0.0327858	-3.70923
ACTR3B	0.192687	-2.82108	2.60549	0.00986511	0.0330874	-3.72134
ASPM	0.393315	-2.87997	2.59907	0.0100454	0.033442	-3.73746
HK2	0.273298	-0.959068	2.59858	0.0100591	0.033442	-3.73868
SPP1	0.825881	1.11992	2.59593	0.0101346	0.0335459	-3.74533
TWIST1	-0.442693	-2.83464	-2.59027	0.010297	0.0339352	-3.75948
LAMB3	-0.549133	-2.64389	-2.58584	0.0104257	0.0342108	-3.77054
SMAD1	-0.19172	-1.87124	-2.57966	0.0106081	0.0346593	-3.78597
NEIL3	0.303767	-4.95217	2.5739	0.0107802	0.0350704	-3.80027
HLA.DOB	-0.327973	-5.05427	-2.57028	0.0108899	0.035276	-3.80927
PRKAA2	-0.516535	-3.55513	-2.56719	0.0109841	0.0354296	-3.81693
CEACAM5	0.963394	-3.84324	2.55808	0.0112667	0.036187	-3.83948
MKI67	0.387095	-2.4405	2.55394	0.0113971	0.0364513	-3.8497
MAML2	-0.31419	-2.55293	-2.53934	0.011868	0.0377982	-3.88562
HDC	-0.524502	-5.24852	-2.52678	0.0122868	0.0389683	-3.91635
RAD54L	0.314739	-3.65194	2.50821	0.0129306	0.0408392	-3.96156
EXO1	0.357986	-4.05242	2.50601	0.0130088	0.0409158	-3.96689
VEGFD	-0.486937	-5.17146	-2.50056	0.0132041	0.0413583	-3.98007
CCL2	-0.396854	0.639212	-2.49807	0.0132946	0.0414704	-3.9861
CNTFR	-0.413402	-4.51472	-2.49121	0.013546	0.0420814	-4.00266
SPC25	0.33564	-3.08376	2.48199	0.0138902	0.0429746	-4.02482
SKP1	-0.190753	2.25251	-2.47778	0.0140503	0.0432931	-4.03493
DLGAP5	0.362327	-2.9857	2.46917	0.0143825	0.0441374	-4.05555
JCAD	-0.282558	-2.54051	-2.45921	0.0147752	0.0451596	-4.07929
XRCC2	0.301067	-3.98904	2.44582	0.0153185	0.0466322	-4.1111
PLD1	0.299422	-2.36755	2.43766	0.0156579	0.0474746	-4.13038
MARCO	0.578049	-3.75061	2.42055	0.0163919	0.0495024	-4.17065
GNLY	-0.43523	-1.8857	-2.41551	0.016614	0.0499738	-4.18247

## Sheet: LNM compared to PT
	logFC	AveExpr	t	P.Value	adj.P.Val	B
CD19	2.98728	-4.65017	14.3044	2.73217e-32	2.07099e-29	62.732
CCL21	3.97361	-1.15803	13.4895	8.53234e-30	3.23376e-27	57.0546
SFRP2	-3.22258	-0.706668	-13.3182	2.85205e-29	5.64411e-27	55.8618
PAX5	2.29183	-4.15926	13.3121	2.97842e-29	5.64411e-27	55.8189
KRT14	-4.21717	-2.64024	-12.888	5.89271e-28	8.93335e-26	52.8685
PLA1A	1.47397	-4.51457	12.5092	8.42267e-27	1.06406e-24	50.2396
ASPN	-2.36674	-2.14252	-12.2612	4.78232e-26	5.17857e-24	48.5233
HLA.DOB	1.85581	-4.25599	12.1233	1.25501e-25	1.18912e-23	47.5698
MMP3	-2.11541	-3.62881	-11.8685	7.42129e-25	6.25037e-23	45.8136
LTB	2.66228	-3.26247	11.6852	2.65664e-24	2.01373e-22	44.5535
TNFAIP6	-1.78094	-1.77669	-11.3998	1.92098e-23	1.32373e-21	42.5989
RAC2	1.58266	-2.03651	11.3802	2.19987e-23	1.38959e-21	42.465
KRT17	-3.65303	-2.72484	-11.264	4.91061e-23	2.86326e-21	41.6718
PRKCB	1.7855	-4.17142	11.0353	2.37263e-22	1.28461e-20	40.1159
GAS1	-1.53822	-2.25998	-10.723	2.01476e-21	1.01812e-19	38.0035
IKZF3	1.88318	-2.30634	10.6969	2.40704e-21	1.14033e-19	37.8279
CD27	2.03699	-2.09972	10.6858	2.5961e-21	1.15755e-19	37.7532
KRT5	-2.76811	-4.38259	-10.5534	6.39645e-21	2.69362e-19	36.8629
MMP7	-2.7764	-3.48726	-10.5112	8.52319e-21	3.4003e-19	36.5796
GJB2	-2.01999	-2.93284	-10.3448	2.6306e-20	9.96999e-19	35.4671
THBS2	-1.76995	0.947588	-10.2	6.99378e-20	2.52442e-18	34.502
MMP14	-1.43626	0.45758	-10.1364	1.07262e-19	3.69567e-18	34.08
VCAN	-1.75485	1.84247	-10.091	1.45479e-19	4.7945e-18	33.7793
FST	-1.78572	-3.1706	-9.97798	3.10381e-19	9.80288e-18	33.0316
COL11A1	-3.10028	-1.46455	-9.88085	5.93858e-19	1.80058e-17	32.3915
FAP	-1.51675	-2.11766	-9.84065	7.76378e-19	2.26344e-17	32.1272
JAK3	1.42647	-1.21733	9.76691	1.26809e-18	3.56005e-17	31.6432
MME	-1.60266	-2.62489	-9.58125	4.3377e-18	1.17428e-16	30.4304
ADAM12	-1.36932	-1.1853	-9.3547	1.92394e-17	5.02879e-16	28.9619
IL7R	1.85379	-2.13374	9.2021	5.20954e-17	1.31628e-15	27.9802
SNAI2	-0.997797	-2.24466	-8.87828	4.22384e-16	1.03242e-14	25.9186
THY1	-0.948123	0.346121	-8.87339	4.35849e-16	1.03242e-14	25.8877
WNT2	-1.10589	-3.09551	-8.54793	3.46105e-15	7.94994e-14	23.848
FBN1	-1.08676	-0.528547	-8.50311	4.59218e-15	1.02379e-13	23.5698
SERPINH1	-0.850122	-0.146095	-8.40159	8.69178e-15	1.88239e-13	22.9421
RUNX3	1.23109	-3.01877	8.39099	9.28863e-15	1.95577e-13	22.8768
TIGIT	1.51434	-3.13195	8.35898	1.13496e-14	2.32513e-13	22.6797
PTGDS	2.09103	-1.06283	8.27863	1.87381e-14	3.73776e-13	22.1866
ISM1	-1.45351	-3.43331	-8.21583	2.76863e-14	5.38109e-13	21.8028
GZMM	1.34064	-5.04724	8.20451	2.97005e-14	5.62824e-13	21.7338
IRX1	-2.54044	-4.36808	-8.14459	4.30384e-14	7.95686e-13	21.3691
FSTL1	-0.908951	1.3796	-8.05198	7.61615e-14	1.37453e-12	20.8082
PIK3CD	1.0706	-2.18737	8.04004	8.19618e-14	1.44481e-12	20.7361
CD1E	1.27381	-5.32507	8.03509	8.44916e-14	1.45556e-12	20.7062
CACNA2D3	1.17494	-5.55652	8.02976	8.73024e-14	1.47056e-12	20.674
ECM2	-1.06702	-1.95221	-7.95739	1.35996e-13	2.24097e-12	20.2386
DCN	-1.33336	2.53927	-7.94715	1.44783e-13	2.29252e-12	20.177
FLI1	0.914092	-1.60914	7.94671	1.45173e-13	2.29252e-12	20.1744
CHI3L1	-1.95226	-3.78326	-7.88336	2.13594e-13	3.30416e-12	19.7951
SPN	1.15766	-3.0428	7.8662	2.37081e-13	3.59416e-12	19.6927
WNT10A	1.25453	-4.02172	7.85842	2.48571e-13	3.69445e-12	19.6462
COL6A3	-1.07857	2.23917	-7.79312	3.69277e-13	5.38292e-12	19.2575
LEF1	1.18016	-0.676975	7.68647	7.02409e-13	1.00458e-11	18.6263
MFNG	0.968879	-2.42543	7.56631	1.44164e-12	2.02364e-11	17.9208
PD1	0.997343	-4.15566	7.51894	1.91099e-12	2.63369e-11	17.6443
OGN	-1.70168	-2.93782	-7.47425	2.49097e-12	3.37171e-11	17.3844
CXCL5	1.38895	-5.04638	7.35414	5.05768e-12	6.72583e-11	16.69
PIK3CG	0.838436	-3.09788	7.33381	5.69824e-12	7.44701e-11	16.5731
TNN	-1.18894	-4.22115	-7.32713	5.92571e-12	7.61304e-11	16.5347
BCL2A1	1.05183	-2.80279	7.29902	6.98532e-12	8.82478e-11	16.3735
ATM	0.760176	-0.10383	7.16833	1.49441e-11	1.85698e-10	15.6284
FLT3	1.17981	-3.87754	7.06566	2.70152e-11	3.30282e-10	15.0486
FGF1	-0.854854	-5.69616	-7.02736	3.36505e-11	4.04875e-10	14.8336
IL2RB	1.14862	-3.80782	7.00582	3.80633e-11	4.50812e-10	14.713
BCL11A	1.6231	-2.42063	6.98587	4.2658e-11	4.91559e-10	14.6015
SERPINB5	-1.78491	-4.22584	-6.98529	4.28007e-11	4.91559e-10	14.5982
SOCS1	0.87986	-2.77677	6.97568	4.52105e-11	5.11486e-10	14.5446
PIK3R5	0.746945	-3.12076	6.97055	4.65521e-11	5.18919e-10	14.516
RBL2	0.53032	0.837528	6.96141	4.90431e-11	5.38764e-10	14.465
KLRK1	1.04791	-3.38919	6.81723	1.10943e-10	1.20136e-09	13.6666
THBS1	-0.821592	1.51772	-6.80474	1.1902e-10	1.27066e-09	13.5979
IL2RA	1.0346	-4.44559	6.7917	1.28068e-10	1.34827e-09	13.5262
MSR1	-0.883006	-0.200082	-6.76269	1.50694e-10	1.56474e-09	13.3672
CD8A	1.08805	-1.83434	6.71622	1.95401e-10	2.00154e-09	13.1133
HLA.E	0.683104	2.39272	6.67397	2.47238e-10	2.49876e-09	12.8834
INHBA	-1.11525	-0.084341	-6.66461	2.60433e-10	2.59748e-09	12.8326
LAMB3	-1.33717	-2.92552	-6.59395	3.85106e-10	3.79105e-09	12.4505
GZMB	0.95829	-4.33655	6.44078	8.91529e-10	8.66298e-09	11.6311
EYA2	-1.03096	-3.20726	-6.43761	9.07018e-10	8.66298e-09	11.6143
CTSW	1.03778	-4.66795	6.43614	9.14299e-10	8.66298e-09	11.6065
GREM1	-1.10448	-1.99083	-6.43138	9.38292e-10	8.78056e-09	11.5813
JCAD	-0.584816	-2.64784	-6.3669	1.33079e-09	1.23017e-08	11.2404
CXCL13	1.88949	-2.11828	6.36249	1.36282e-09	1.2446e-08	11.2172
NKG7	0.969896	-2.56852	6.35302	1.43434e-09	1.29432e-08	11.1673
TWIST1	-0.937618	-3.01058	-6.32355	1.68111e-09	1.49916e-08	11.0125
CD276	-0.639896	0.706313	-6.30453	1.86208e-09	1.62236e-08	10.9129
B7.H3	-0.639896	0.706313	-6.30453	1.86208e-09	1.62236e-08	10.9129
KAT2B	0.627918	-1.67466	6.29377	1.97282e-09	1.69931e-08	10.8566
FLNC	-0.80239	-3.8602	-6.19629	3.31967e-09	2.82731e-08	10.3495
LIFR	0.971433	-1.74504	6.08099	6.103e-09	5.14008e-08	9.75662
IL6R	0.741429	-2.11774	6.04629	7.32016e-09	6.09745e-08	9.57966
CMKLR1	0.657103	-1.07626	6.00658	9.0061e-09	7.42024e-08	9.37801
IL10RA	0.775414	-1.15123	5.99589	9.52153e-09	7.76056e-08	9.32388
TIS	0.789723	6.81179	5.96407	1.12325e-08	9.05766e-08	9.16318
GNLY	0.998892	-1.35934	5.93329	1.31723e-08	1.05101e-07	9.00829
CCR2	0.892435	-3.47104	5.92953	1.34308e-08	1.06048e-07	8.9894
LRRC32	-0.712555	-2.21681	-5.91579	1.4418e-08	1.12669e-07	8.92045
TSPAN7	0.938455	-3.39587	5.89785	1.5814e-08	1.22317e-07	8.83063
FSTL3	-0.780411	-2.19156	-5.88687	1.67333e-08	1.27298e-07	8.77572
PTEN	0.505753	-0.201062	5.88617	1.67939e-08	1.27298e-07	8.77221
RASGRP1	0.996893	-2.45951	5.82747	2.26869e-08	1.70264e-07	8.48
HLA.DMB	0.60915	-2.06364	5.79577	2.66661e-08	1.98166e-07	8.32306
SFRP4	-1.19544	0.0423563	-5.76966	3.04497e-08	2.24086e-07	8.19423
BNC2	-0.795833	-3.29128	-5.69502	4.43977e-08	3.23591e-07	7.82825
PRF1	0.791241	-3.43999	5.69254	4.49569e-08	3.24546e-07	7.81611
OLFML2B	-0.703013	-0.970353	-5.67152	4.99628e-08	3.57281e-07	7.7137
HLA.DPB1	0.672697	2.26213	5.65282	5.48693e-08	3.887e-07	7.62285
KIT	-1.08282	-2.04811	-5.64209	5.78958e-08	4.06343e-07	7.57078
RBL1	0.455571	-2.30206	5.61291	6.69737e-08	4.65744e-07	7.42956
CD8B	0.896046	-3.19416	5.60681	6.90399e-08	4.75748e-07	7.40011
GZMA	0.783028	-2.96361	5.59678	7.25699e-08	4.95567e-07	7.35177
TNF	0.644105	-2.41778	5.57527	8.07534e-08	5.46527e-07	7.24821
WNT5A	-0.868391	-1.62589	-5.57273	8.17781e-08	5.48564e-07	7.23599
RORA	0.60069	-1.06159	5.56027	8.6986e-08	5.7838e-07	7.17617
IDO1	1.11325	-3.06123	5.44531	1.53073e-07	1.00895e-06	6.62887
MMP11	-1.42314	0.702757	-5.4109	1.81001e-07	1.18275e-06	6.4667
IL3RA	0.573316	-1.65351	5.39509	1.95442e-07	1.2662e-06	6.39245
CDH3	-1.01475	-3.6758	-5.37056	2.2009e-07	1.4138e-06	6.27757
MARCO	1.13731	-3.55255	5.31883	2.8241e-07	1.79888e-06	6.03653
MEOX2	0.954872	-4.33959	5.26515	3.65155e-07	2.30657e-06	5.78824
CDKN2B	-0.673695	-3.03905	-5.23418	4.23156e-07	2.65084e-06	5.64587
NUMBL	-0.400898	-2.70062	-5.22988	4.31879e-07	2.68331e-06	5.62617
GRIN1	0.469634	-5.95769	5.22002	4.52565e-07	2.78898e-06	5.581
FOXP3	0.767696	-4.13724	5.14436	6.46697e-07	3.9532e-06	5.23654
KRT6B	-1.09524	-5.41526	-5.03617	1.07052e-06	6.49165e-06	4.75069
CRYAB	-1.08504	-2.13355	-5.02165	1.14483e-06	6.88715e-06	4.68605
BMP7	-1.10467	-4.67948	-5.0162	1.17393e-06	7.00663e-06	4.66188
SOX10	-2.5393	-7.48895	-5.00951	1.21073e-06	7.16981e-06	4.63215
WDR77	0.293579	-1.09718	4.9588	1.52804e-06	8.97869e-06	4.4081
CXCL9	1.1156	-0.737024	4.8702	2.28557e-06	1.33266e-05	4.02088
FZD7	-0.69247	-1.92123	-4.86562	2.33332e-06	1.35012e-05	4.00101
JAG1	-0.480002	-0.349503	-4.85591	2.43774e-06	1.39986e-05	3.95893
IL1R2	0.766583	-5.25233	4.83888	2.6319e-06	1.49998e-05	3.8853
COMP	-1.15964	-1.14902	-4.82928	2.74782e-06	1.55436e-05	3.8439
ITGB1	-0.331814	1.68708	-4.81893	2.87845e-06	1.61619e-05	3.79929
FNBP1	0.466605	-0.736636	4.77159	3.55595e-06	1.98192e-05	3.59635
BLM	0.47622	-3.4664	4.7685	3.60518e-06	1.99469e-05	3.58316
CD84	0.52622	-1.86012	4.71766	4.51595e-06	2.4805e-05	3.36707
ITGB3	-0.699484	-4.28582	-4.70993	4.67262e-06	2.54809e-05	3.33437
SPP1	-1.30034	0.337804	-4.69648	4.95767e-06	2.68422e-05	3.2776
TGFB3	-0.697002	0.129695	-4.67282	5.50044e-06	2.95697e-05	3.17802
CYBB	0.51163	-0.553673	4.65416	5.96827e-06	3.18588e-05	3.0998
BMP6	0.675921	-3.97215	4.64681	6.1631e-06	3.26687e-05	3.06903
SFN	-0.830725	-2.34974	-4.61247	7.15684e-06	3.76728e-05	2.92587
SP1	0.356195	-0.454517	4.60482	7.39841e-06	3.86758e-05	2.89409
JAK2	0.484498	-1.639	4.59931	7.57734e-06	3.93399e-05	2.87122
HLA.DPA1	0.520943	1.47292	4.57224	8.51792e-06	4.38051e-05	2.75925
S1PR1	0.612932	-4.56586	4.57129	8.55297e-06	4.38051e-05	2.75532
HDAC1	0.293665	0.579794	4.56842	8.65948e-06	4.40529e-05	2.74348
HDAC10	0.33818	-1.27346	4.55627	9.12445e-06	4.61089e-05	2.69345
MMP9	1.0868	-0.303672	4.53913	9.82214e-06	4.93058e-05	2.62298
FOSL1	-0.623375	-4.39151	-4.49677	1.17724e-05	5.87073e-05	2.44986
IL4R	0.481979	0.175398	4.43279	1.54409e-05	7.64979e-05	2.19082
CCND2	0.521561	-2.04313	4.42109	1.62209e-05	7.98406e-05	2.14379
HLA.DRA	0.502151	2.36651	4.40287	1.75116e-05	8.51301e-05	2.07075
HDC	-0.709879	-5.31096	-4.40275	1.75202e-05	8.51301e-05	2.07028
THBS4	-1.05227	-0.615683	-4.35407	2.14727e-05	0.000103671	1.87633
BCL2	0.674012	-0.739208	4.3465	2.216e-05	0.000106312	1.8463
CAV1	-0.571721	-1.24032	-4.32895	2.3834e-05	0.000113623	1.77692
SRPX	-0.712921	-4.07224	-4.30213	2.66292e-05	0.000125957	1.67132
PPARG	-0.541478	-2.86586	-4.301	2.67535e-05	0.000125957	1.66689
FGF18	-0.559744	-4.06767	-4.29855	2.70252e-05	0.000126451	1.65727
IL11RA	0.521272	-1.25128	4.27265	3.00622e-05	0.000139798	1.55591
FGFR2	-0.802001	-2.07143	-4.26598	3.08969e-05	0.000142804	1.52985
PSMB9	0.556746	0.530711	4.25224	3.26844e-05	0.00015015	1.47635
EGLN3	-0.755846	-1.93113	-4.24659	3.34482e-05	0.000152733	1.45438
PROM1	-1.4413	-3.58624	-4.24219	3.40535e-05	0.000154566	1.43733
TUBA4A	0.663655	-2.80157	4.23643	3.4864e-05	0.000157303	1.41497
COL7A1	-0.65661	-2.12595	-4.22499	3.65267e-05	0.00016383	1.37067
CDC14A	0.59469	-2.713	4.18958	4.21702e-05	0.00018803	1.23416
HEMK1	0.352963	-1.10557	4.17222	4.52326e-05	0.000200505	1.16758
ROCK1	0.285642	-0.760846	4.1605	4.74192e-05	0.000208832	1.12277
BBOX1	-0.892245	-5.17877	-4.15922	4.76623e-05	0.000208832	1.11791
DDR2	-0.44813	-1.3397	-4.1432	5.08298e-05	0.000221431	1.05685
PTGS2	0.673172	-5.21306	4.13407	5.27244e-05	0.000228372	1.02212
PLAT	-0.874738	0.351299	-4.13222	5.31174e-05	0.000228767	1.01508
ITGB6	-0.866899	-2.01507	-4.1082	5.84661e-05	0.00025038	0.924086
APOD	-1.2832	1.76135	-4.10544	5.91113e-05	0.000251721	0.913681
TGFB2	-0.817399	-2.12112	-4.09362	6.19583e-05	0.000262371	0.869089
GRIA3	-0.532375	-4.50825	-4.04152	7.61394e-05	0.000320631	0.673849
CCL5	0.669929	-1.1848	3.98825	9.38053e-05	0.000391014	0.476436
CLDN1	-0.779387	-4.66114	-3.98803	9.38847e-05	0.000391014	0.475636
ZNF205	-0.317769	-1.72838	-3.9312	0.000117025	0.00048358	0.267467
TLE3	0.409751	1.55567	3.9304	0.000117386	0.00048358	0.264555
DTX1	0.574401	-3.35765	3.92126	0.00012159	0.000498192	0.231335
HLA.B	0.502531	6.30391	3.91736	0.00012343	0.00050301	0.217163
PRKACA	-0.217072	-0.538405	-3.90145	0.000131203	0.000531829	0.159529
PTGER3	-0.808747	-1.33883	-3.89771	0.000133098	0.000536639	0.146003
FAM198B	-0.657629	0.637225	-3.88914	0.000137533	0.000551587	0.115084
VEGFA	-0.500904	0.135663	-3.88136	0.000141683	0.000565241	0.0870463
NSD1	0.266708	-0.190056	3.87044	0.000147713	0.000586213	0.0477475
FGF10	-0.984595	-4.37569	-3.86838	0.000148877	0.000587754	0.0403497
CXCR6	0.544178	-3.73707	3.82292	0.000176883	0.000694702	-0.122038
CCL2	0.59359	1.00366	3.78464	0.000204269	0.000798122	-0.257498
GABRP	-1.12737	-2.41528	-3.75771	0.000225893	0.000878086	-0.352103
PRKCA	0.524267	-3.51747	3.75427	0.000228806	0.000884873	-0.364146
C5orf38	-0.711172	-1.91344	-3.74907	0.000233276	0.000897578	-0.382324
EDNRB	0.505323	-3.83609	3.74261	0.000238943	0.000910983	-0.404879
CLEC5A	-0.576737	-4.36055	-3.74236	0.000239163	0.000910983	-0.405742
PRKACB	0.52036	-0.759202	3.74008	0.000241201	0.000914151	-0.413712
NFATC1	0.414444	-1.24745	3.73606	0.000244825	0.000923271	-0.427721
SOCS2	0.681692	-2.89263	3.69834	0.000281451	0.00105614	-0.558594
BAX	0.20281	-0.46053	3.68888	0.000291413	0.00108813	-0.591225
WT1	-0.649561	-5.70815	-3.66309	0.000320289	0.00119009	-0.67981
CDKN2D	0.397499	-2.91839	3.65612	0.000328554	0.00121485	-0.703686
KIAA0040	0.501649	0.23245	3.65155	0.000334077	0.00122927	-0.719306
FGF9	0.416742	-4.85639	3.63155	0.00035928	0.00131562	-0.787426
LAMA3	0.668538	-2.31327	3.60127	0.000400898	0.00146097	-0.890007
PDGFRB	-0.424335	-0.380835	-3.58052	0.000431985	0.00156672	-0.959845
HLA.DMA	0.344037	0.336923	3.57839	0.0004353	0.00157122	-0.966992
TAP2	0.403828	0.128314	3.54764	0.000485919	0.00174563	-1.06977
RAC3	-0.411853	-1.78344	-3.54587	0.000489007	0.00174843	-1.07569
LEP	-0.740935	-6.03398	-3.51292	0.000549721	0.00195628	-1.18491
NUPR1	-0.429086	2.00134	-3.49786	0.000579777	0.0020536	-1.23455
BAIAP2L1	-0.442955	-0.834042	-3.48771	0.000600898	0.00211852	-1.26791
CDKN1C	-0.489981	-2.16713	-3.48471	0.000607278	0.0021311	-1.27775
MLLT3	0.403142	-0.491087	3.48042	0.000616504	0.0021535	-1.2918
SMAD3	0.397576	-1.40248	3.47109	0.000637035	0.00221501	-1.32232
RPS6KA5	0.328569	-3.15961	3.46948	0.000640626	0.00221733	-1.32755
NUDT1	0.236971	-1.62784	3.45307	0.000678511	0.00233778	-1.38105
RASGRF2	-0.445691	-2.9349	-3.44883	0.000688615	0.00235304	-1.39481
ADM	-0.59652	-2.61037	-3.44861	0.000689148	0.00235304	-1.39553
ZEB1	-0.378336	-0.601545	-3.42546	0.000746989	0.00253909	-1.47051
RASGRF1	0.579172	-4.69663	3.40013	0.000815465	0.00275947	-1.55203
PSMB10	0.331643	-1.40207	3.3847	0.000860018	0.00289731	-1.60144
HIST1H2BH	0.366843	1.96931	3.36366	0.000924403	0.00310043	-1.66845
SIGIRR	0.340547	-0.00518846	3.35152	0.000963582	0.0032176	-1.70696
ZEB2	0.332338	-0.801346	3.32808	0.00104368	0.00346976	-1.78098
CD274	0.381073	-3.51043	3.3168	0.00108439	0.00357378	-1.81643
PDL1	0.381073	-3.51043	3.3168	0.00108439	0.00357378	-1.81643
KRT7	-1.04107	-0.937701	-3.27884	0.00123249	0.00404426	-1.9349
SLPI	-1.0351	-3.90072	-3.27691	0.00124051	0.00405303	-1.9409
BCL2L1	0.244632	0.579369	3.27163	0.00126268	0.00410778	-1.95728
HOXB3	-0.664573	-1.83106	-3.26602	0.00128664	0.00416782	-1.97466
BCL6B	-0.34157	-3.48142	-3.25253	0.00134598	0.00434151	-2.01633
EFNA3	-0.503419	-2.97824	-3.2471	0.00137057	0.00440209	-2.03305
GZMH	0.418401	-5.79341	3.24289	0.00138991	0.00444535	-2.04598
HGF	-0.428529	-4.75081	-3.20012	0.00160149	0.00510056	-2.17672
LFNG	0.487925	-1.19883	3.19809	0.00161224	0.00511329	-2.18288
DKK2	0.450322	-4.53357	3.19268	0.00164125	0.00518362	-2.19932
PALMD	-0.475505	-0.87506	-3.18506	0.00168286	0.00527803	-2.22239
SFRP1	-0.887581	-1.28736	-3.18465	0.00168511	0.00527803	-2.22362
TPSAB1	-0.731228	0.531339	-3.18341	0.00169203	0.00527803	-2.2274
GPR160	0.505513	0.134899	3.18086	0.00170624	0.00530053	-2.2351
CD36	-0.703096	-3.36496	-3.13782	0.00196359	0.00607509	-2.36436
IRF6	-0.446173	-0.243639	-3.12279	0.00206163	0.00635251	-2.40914
TIMP4	-0.665865	-4.10877	-3.11548	0.00211089	0.00647795	-2.43083
EP300	0.168105	0.511122	3.09593	0.0022481	0.00687122	-2.48864
HIST1H1C	0.277022	2.80302	3.06977	0.00244464	0.00743962	-2.56549
TCF7L1	-0.456309	-0.23997	-3.06861	0.0024537	0.00743962	-2.56888
BMPR1A	-0.198945	-1.68494	-3.05937	0.00252711	0.00763166	-2.59589
ITPR1	0.436952	-0.227473	3.0461	0.00263598	0.00792886	-2.63451
LIF	-0.487029	-4.15229	-3.03555	0.00272559	0.0081637	-2.66511
ELF3	-0.538958	2.13198	-3.0344	0.00273559	0.0081637	-2.66846
TGFB1	0.284654	0.992638	3.02075	0.00285616	0.00840428	-2.70791
TGF.beta	0.284654	0.992638	3.02075	0.00285616	0.00840428	-2.70791
ARID1A	0.163852	0.143218	3.02053	0.00285807	0.00840428	-2.70852
MAPK1	0.182622	0.954958	3.02018	0.00286125	0.00840428	-2.70953
FLRT3	-0.724535	-4.36112	-3.01903	0.00287165	0.00840428	-2.71285
COLEC12	-0.411227	-2.77971	-3.01103	0.00294497	0.00858572	-2.73589
FANCF	0.19989	-2.21743	2.99805	0.00306753	0.00890875	-2.77314
LPL	-0.533688	-2.4805	-2.96993	0.00334919	0.00968965	-2.85331
HIST1H3H	0.393823	-0.190982	2.93166	0.0037709	0.0108682	-2.96136
TYK2	0.218996	0.559651	2.92541	0.00384421	0.0110375	-2.97888
CFD	-0.540759	0.725755	-2.92382	0.00386303	0.0110497	-2.98333
ENO1	-0.274733	1.82564	-2.91947	0.00391508	0.0111565	-2.9955
GPC4	-0.488788	-2.30301	-2.90947	0.0040371	0.0114611	-3.02341
DPT	0.574233	0.32284	2.90265	0.00412228	0.0116593	-3.04238
PLCE1	-0.509556	-4.44475	-2.88644	0.00433137	0.0122051	-3.08733
RORB	-0.349211	-6.02824	-2.88341	0.00437161	0.0122729	-3.09572
GLI3	-0.425234	-0.80772	-2.88209	0.00438917	0.0122767	-3.09936
PRKX	0.317346	-4.86793	2.8753	0.00448076	0.0124868	-3.1181
MS4A2	-0.476249	-2.21136	-2.86452	0.00462965	0.0127781	-3.14776
TYMP	-0.283413	1.49357	-2.86423	0.0046337	0.0127781	-3.14855
JUN	-0.424079	1.11662	-2.86408	0.00463585	0.0127781	-3.14897
SMO	-0.368451	-3.55262	-2.8593	0.00470345	0.0129153	-3.1621
CCL4	0.361424	-2.07568	2.85753	0.00472869	0.0129153	-3.16695
JAK1	0.184662	1.60496	2.85696	0.00473676	0.0129153	-3.16849
CXADR	-0.620113	-1.64693	-2.83321	0.00508817	0.0138086	-3.23332
LEPR	0.496428	-2.55552	2.83239	0.00510079	0.0138086	-3.23556
CCL3L1	0.441263	-2.04712	2.82852	0.00516039	0.0139202	-3.24608
AGT	-0.531336	-3.38746	-2.82348	0.00523896	0.014082	-3.25975
FGF13	0.40408	-3.34605	2.81105	0.00543735	0.0145636	-3.29337
SPRY1	-0.380318	-1.3213	-2.75604	0.00640037	0.0170827	-3.44055
RAD51C	0.226102	-1.95141	2.75394	0.00643993	0.017128	-3.4461
HAPLN1	-0.417886	-5.45096	-2.73544	0.00679901	0.0180197	-3.49496
SOX2	0.441764	-4.9708	2.72212	0.00706854	0.0186688	-3.52994
CPA3	-0.546152	-2.65933	-2.71559	0.00720425	0.0189612	-3.54703
PHGDH	-0.587232	-1.03271	-2.7123	0.00727348	0.0190772	-3.55563
MAML2	0.328882	-2.31576	2.7062	0.0074035	0.0193512	-3.57155
PLA2G4A	0.290551	-4.2957	2.69456	0.00765744	0.0199462	-3.60183
CYP4F3	0.391297	-6.95732	2.68993	0.00776054	0.0201455	-3.61384
FGFR4	0.589142	-3.65135	2.6599	0.00846072	0.0218882	-3.69128
HK2	-0.289545	-1.16663	-2.65442	0.00859448	0.0221033	-3.70533
IBSP	-0.498786	-3.65369	-2.6541	0.0086022	0.0221033	-3.70613
EMCN	-0.367453	-3.61494	-2.6421	0.00890206	0.0227965	-3.73679
ISG15	-0.525606	0.0520002	-2.61523	0.00960759	0.0245204	-3.80496
TNKS2	0.1667	0.634662	2.61322	0.00966233	0.0245773	-3.81003
FOXC1	-0.577513	-2.29537	-2.59723	0.0101077	0.0255527	-3.85024
MIA	-0.604401	-3.8832	-2.59694	0.0101162	0.0255527	-3.85099
NRCAM	0.558576	-4.74087	2.59586	0.0101469	0.0255527	-3.85369
ID2	0.233118	-1.00722	2.58056	0.010592	0.0265851	-3.89195
LAG3	0.336509	-3.80166	2.5784	0.010656	0.0266576	-3.89732
PIK3R2	-0.196183	0.284053	-2.57413	0.0107842	0.0268895	-3.90797
MLH1	0.142287	-1.85099	2.55803	0.0112791	0.0280313	-3.94789
GRB2	0.195695	-0.706414	2.54244	0.0117778	0.0291752	-3.98635
IL1B	0.40751	-3.03155	2.5329	0.0120926	0.0298574	-4.00977
SOX9	-0.51624	-0.314112	-2.52776	0.0122652	0.0301851	-4.02234
MYCT1	0.283489	-3.47241	2.52646	0.0123093	0.0301955	-4.02553
CDC25B	0.256355	-1.13996	2.51116	0.0128379	0.0313908	-4.06281
INHBB	-0.442606	-1.59235	-2.49472	0.0134288	0.0327299	-4.10266
NSD3	0.294969	-0.26316	2.48652	0.013732	0.0333618	-4.12242
CLEC14A	-0.276614	-2.44766	-2.48497	0.0137902	0.0333961	-4.12616
CKS1B	-0.245772	0.198304	-2.48162	0.0139164	0.0335944	-4.13422
SHC4	-0.527441	-5.19619	-2.45661	0.0148918	0.0358349	-4.19406
HLA.C	0.259996	2.61473	2.42725	0.0161142	0.0386537	-4.26359
ACVRL1	0.22452	-2.56191	2.41732	0.0165472	0.039567	-4.28692
WNT7B	-0.413804	-3.15187	-2.38742	0.0179136	0.0425339	-4.35663
GDF5	0.303719	-6.2945	2.38666	0.0179497	0.0425339	-4.35839
HNF1A	0.286359	-5.04831	2.38652	0.0179563	0.0425339	-4.35871
HLA.DRB1	0.386119	2.31674	2.38423	0.0180649	0.042658	-4.36401
PDGFRA	-0.304002	0.0351974	-2.37347	0.0185844	0.0437484	-4.38886
CCL8	-0.398589	-3.29729	-2.37026	0.018742	0.0439828	-4.39626
PRKAA2	-0.484031	-3.53832	-2.36443	0.0190312	0.0444024	-4.40967
CACNA1D	-0.50239	-2.31015	-2.36413	0.0190461	0.0444024	-4.41036
SHC2	-0.366225	-1.81323	-2.36204	0.019151	0.0444024	-4.41517
BMP8A	-0.344975	-4.02308	-2.36182	0.0191617	0.0444024	-4.41566
HBB	0.651538	-0.305511	2.36079	0.0192137	0.0444024	-4.41803
MED1	0.238748	-1.23895	2.35007	0.01976	0.0454968	-4.44256
CDCA7L	0.344782	-1.04365	2.34915	0.0198073	0.0454968	-4.44465
HEG1	-0.199041	-1.87353	-2.31682	0.0215428	0.0492678	-4.51799
AKT3	0.304219	-1.12832	2.31617	0.021579	0.0492678	-4.51946
SPRY2	-0.310845	-2.49325	-2.30987	0.0219323	0.0499239	-4.53361

## Sheet: DM compared to LNM
	logFC	AveExpr	t	P.Value	adj.P.Val	B
CD19	-3.35594	-4.46326	-13.0579	2.39652e-26	1.04081e-23	49.2872
CD27	-2.93163	-2.30055	-13.0355	2.7462e-26	1.04081e-23	49.1529
CCL21	-4.89944	-1.13163	-12.0981	8.27871e-24	1.67347e-21	43.5229
IL7R	-2.9431	-2.45692	-12.0875	8.83099e-24	1.67347e-21	43.4592
IKZF3	-2.59578	-2.43357	-11.9033	2.71542e-23	4.11657e-21	42.3513
HLA.DOB	-2.18378	-4.19037	-11.8608	3.5191e-23	4.44579e-21	42.0956
LTB	-3.28144	-3.2442	-11.6337	1.40583e-22	1.52232e-20	40.7296
TIGIT	-2.55198	-3.47137	-11.5625	2.16894e-22	2.05507e-20	40.3019
PAX5	-2.43418	-3.94416	-11.3995	5.85849e-22	4.93415e-20	39.3219
CXCL13	-3.10656	-2.50217	-9.8827	5.69181e-18	4.31439e-16	30.2696
PLA1A	-1.58492	-4.38613	-9.76715	1.13676e-17	7.83328e-16	29.5881
CD8A	-1.89853	-2.11135	-9.73926	1.34305e-17	8.48362e-16	29.4237
RAC2	-1.75476	-1.92564	-9.45784	7.18405e-17	4.18885e-15	27.7719
FLT3	-1.80476	-4.04836	-9.4076	9.68063e-17	5.24137e-15	27.4781
PRKCB	-1.89939	-4.00538	-9.24723	2.50213e-16	1.26441e-14	26.543
IL2RB	-1.73797	-3.96438	-9.0776	6.80227e-16	3.22258e-14	25.5584
IDO1	-2.02559	-3.38707	-8.94805	1.45531e-15	6.48898e-14	24.8098
GZMM	-1.74408	-5.08482	-8.91064	1.81186e-15	7.62994e-14	24.5942
CCND2	-1.34308	-2.3969	-8.6986	6.24157e-15	2.4436e-13	23.3773
CXCL9	-2.3533	-1.22861	-8.69301	6.44749e-15	2.4436e-13	23.3453
CD1E	-1.72617	-5.396	-8.62221	9.7247e-15	3.3598e-13	22.9411
TIS	-1.29197	6.65462	-8.62174	9.7514e-15	3.3598e-13	22.9384
PD1	-1.44417	-4.25848	-8.46601	2.39919e-14	7.90691e-13	22.0531
JAK3	-1.54809	-1.1003	-8.44383	2.72633e-14	8.61067e-13	21.9274
RASGRP1	-1.74123	-2.71422	-8.42884	2.97215e-14	9.01157e-13	21.8425
KLRK1	-1.50242	-3.48957	-8.41907	3.144e-14	9.16598e-13	21.7873
CD8B	-1.6475	-3.46516	-8.40634	3.38299e-14	9.49742e-13	21.7152
FOXP3	-1.43477	-4.38129	-8.39293	3.6541e-14	9.89218e-13	21.6395
WNT10A	-1.55596	-4.01804	-8.29019	6.58831e-14	1.72205e-12	21.0601
CCL5	-1.49687	-1.52271	-8.19108	1.16065e-13	2.93258e-12	20.5036
GZMA	-1.32119	-3.13995	-7.81005	1.00078e-12	2.44707e-11	18.388
SPN	-1.42487	-3.03382	-7.52182	4.97402e-12	1.17822e-10	16.815
MEOX2	-1.59636	-4.54709	-7.45901	7.03137e-12	1.61508e-10	16.4756
ASPN	1.89329	-2.6813	7.42656	8.40477e-12	1.87377e-10	16.3007
IL2RA	-1.43428	-4.51967	-7.36095	1.20422e-11	2.608e-10	15.9482
PIK3CG	-1.03827	-3.09459	-7.34278	1.32999e-11	2.80037e-10	15.8509
FST	1.60438	-3.48735	7.23953	2.33444e-11	4.78244e-10	15.2997
CTSW	-1.36105	-4.70264	-7.19145	3.02996e-11	6.04397e-10	15.0443
HLA.DRA	-1.04565	2.15219	-7.11917	4.47759e-11	8.7026e-10	14.6619
RUNX3	-1.19629	-2.84644	-6.98481	9.21097e-11	1.74548e-09	13.956
BCL11A	-1.93116	-2.37406	-6.89533	1.4838e-10	2.74323e-09	13.4896
IL6	-1.29442	-3.46269	-6.81231	2.30331e-10	4.15693e-09	13.0596
CXCR6	-1.17422	-3.99029	-6.75909	3.04929e-10	5.37526e-09	12.7854
GNLY	-1.43412	-1.45604	-6.60399	6.86492e-10	1.18264e-08	11.9926
LEF1	-1.21113	-0.544613	-6.55872	8.68416e-10	1.4628e-08	11.7631
ZFPM2	-0.911436	-5.07406	-6.43651	1.6314e-09	2.68826e-08	11.1477
MFNG	-0.989437	-2.31428	-6.40593	1.90838e-09	3.07778e-08	10.9948
PTGDS	-2.00351	-0.755631	-6.35804	2.43761e-09	3.84939e-08	10.7561
HLA.E	-0.778977	2.42956	-6.30179	3.24578e-09	5.02102e-08	10.4769
FOS	-1.71133	-0.711931	-6.26958	3.82164e-09	5.70187e-08	10.3177
COL11A1	2.57952	-2.11957	6.26882	3.83635e-09	5.70187e-08	10.314
ITGB3	1.47885	-3.9759	6.20323	5.34269e-09	7.68977e-08	9.99128
PIK3CD	-1.13696	-2.08682	-6.20196	5.37675e-09	7.68977e-08	9.98509
IBSP	2.76761	-2.55843	6.1607	6.6156e-09	9.28634e-08	9.78314
IL3RA	-0.842865	-1.71909	-6.10944	8.55056e-09	1.17842e-07	9.53334
PRF1	-1.07949	-3.48775	-6.09992	8.96672e-09	1.21371e-07	9.48708
IL10RA	-0.975974	-1.15623	-6.08228	9.79111e-09	1.30205e-07	9.40147
SOCS1	-0.872759	-2.66268	-6.04302	1.19022e-08	1.55549e-07	9.21147
CCL4	-0.940983	-2.32607	-5.91121	2.28051e-08	2.91357e-07	8.57907
PSMB9	-0.943772	0.403095	-5.90892	2.30625e-08	2.91357e-07	8.56816
MYC	-1.02536	0.419184	-5.87121	2.77356e-08	3.44649e-07	8.38885
SPP1	2.12622	0.596027	5.85564	2.99258e-08	3.65868e-07	8.315
HLA.DPB1	-0.971229	2.19424	-5.80608	3.80845e-08	4.58223e-07	8.08081
PIK3R5	-0.841716	-3.07534	-5.80098	3.90379e-08	4.62355e-07	8.05679
NR4A1	-1.37702	-1.22681	-5.7881	4.15533e-08	4.84576e-07	7.99615
BCL2A1	-1.16203	-2.72697	-5.77399	4.44912e-08	5.10974e-07	7.92982
NR4A3	-1.17585	-4.55226	-5.76189	4.71716e-08	5.33673e-07	7.87303
HLA.DPA1	-0.90401	1.34283	-5.71567	5.8943e-08	6.57041e-07	7.65679
HGF	0.998172	-4.5139	5.60469	1.00206e-07	1.10082e-06	7.14206
NKG7	-1.11421	-2.5204	-5.55964	1.24075e-07	1.34356e-06	6.93497
DTX1	-1.00516	-3.50537	-5.48405	1.77159e-07	1.89136e-06	6.58995
CD274	-0.747612	-3.64965	-5.42767	2.30624e-07	2.3947e-06	6.33463
PDL1	-0.747612	-3.64965	-5.42767	2.30624e-07	2.3947e-06	6.33463
TSPAN7	-1.02107	-3.3202	-5.39985	2.62517e-07	2.68902e-06	6.20929
FLI1	-0.80502	-1.4387	-5.38715	2.78476e-07	2.81446e-06	6.15219
BMP2	1.27802	-4.45616	5.34401	3.40054e-07	3.39159e-06	5.95897
CCR2	-1.00705	-3.41749	-5.33997	3.46456e-07	3.41056e-06	5.94094
TNF	-0.758578	-2.39533	-5.3046	4.07768e-07	3.96267e-06	5.78341
PTGS2	-1.00322	-5.29698	-5.26502	4.88973e-07	4.69167e-06	5.60791
BMP5	1.2396	-4.6556	5.25587	5.09861e-07	4.83093e-06	5.5675
HLA.DMB	-0.737499	-2.05267	-5.11891	9.48773e-07	8.87864e-06	4.96803
NCAM1	1.35972	-3.01992	5.10683	1.00171e-06	9.25968e-06	4.91566
ATM	-0.676232	0.0344531	-5.09788	1.04278e-06	9.52325e-06	4.87691
HLA.B	-0.751036	6.24018	-5.08764	1.09173e-06	9.8516e-06	4.83268
ROCK1	-0.414629	-0.790811	-5.02983	1.41307e-06	1.26013e-05	4.58402
HLA.DMA	-0.594978	0.252051	-4.89974	2.50787e-06	2.21042e-05	4.03179
SERPINH1	0.707066	-0.325838	4.88935	2.62439e-06	2.28654e-05	3.98811
CCL2	-0.990444	0.875653	-4.84114	3.237e-06	2.78824e-05	3.78642
WIF1	1.80985	-5.89764	4.82116	3.52972e-06	3.00621e-05	3.70323
RORA	-0.671084	-1.0221	-4.81755	3.58525e-06	3.01958e-05	3.68824
FNBP1	-0.573124	-0.732414	-4.81064	3.694e-06	3.07698e-05	3.65953
ZNF205	0.472806	-1.68915	4.78559	4.11537e-06	3.39071e-05	3.55579
LAMA3	-1.08131	-2.43998	-4.7548	4.6975e-06	3.82871e-05	3.42877
AGT	1.37739	-3.02239	4.74854	4.82524e-06	3.89099e-05	3.40302
S1PR1	-0.742689	-4.55512	-4.72302	5.38154e-06	4.2939e-05	3.29832
CYP4F3	1.45689	-5.96498	4.66771	6.80822e-06	5.37565e-05	3.07282
VEGFA	0.753659	0.201766	4.62766	8.06257e-06	6.30044e-05	2.91078
BTG2	-0.724298	1.92631	-4.60726	8.78479e-06	6.79477e-05	2.82861
BCL2	-0.870661	-0.754942	-4.53493	1.18824e-05	9.09786e-05	2.53954
LTBP1	0.852891	0.00339887	4.50154	1.36455e-05	0.000103433	2.40726
JAK1	-0.357882	1.53974	-4.49695	1.39065e-05	0.000104368	2.38914
THBS4	-1.44015	-2.01979	-4.47	1.55403e-05	0.000114561	2.28299
FGL2	-0.744764	-1.95477	-4.46959	1.5567e-05	0.000114561	2.28135
MSR1	0.760508	-0.373462	4.44647	1.71173e-05	0.000124759	2.19067
PSMB10	-0.510006	-1.45145	-4.43117	1.82231e-05	0.000130739	2.13089
GRB2	-0.463597	-0.818566	-4.42958	1.83419e-05	0.000130739	2.12469
PDCD1LG2	-0.613933	-3.53087	-4.4258	1.86276e-05	0.000130739	2.10993
PDL2	-0.613933	-3.53087	-4.4258	1.86276e-05	0.000130739	2.10993
HAPLN1	0.984843	-5.21408	4.41085	1.97999e-05	0.000137691	2.05168
BAIAP2L1	0.685712	-0.765767	4.39796	2.08666e-05	0.00014379	2.0016
PTEN	-0.437696	-0.102831	-4.37402	2.2997e-05	0.000157042	1.90887
ID1	0.77067	-2.16997	4.33607	2.68078e-05	0.000181431	1.76268
SLPI	1.63127	-3.72642	4.32637	2.78753e-05	0.000186987	1.72547
CXCL5	-1.02035	-4.68388	-4.32084	2.85018e-05	0.000189512	1.7043
MAML2	-0.643072	-2.43481	-4.31433	2.92574e-05	0.000192844	1.67937
HBB	1.88363	1.0701	4.2378	3.9705e-05	0.000259451	1.3887
JAK2	-0.547677	-1.61041	-4.20866	4.4557e-05	0.000288668	1.27907
CCR5	-0.603953	-4.32431	-4.20018	4.60719e-05	0.000293737	1.24729
TAP2	-0.571841	0.093271	-4.19995	4.61144e-05	0.000293737	1.24641
KRT17	1.48697	-4.28893	4.18172	4.95428e-05	0.000312945	1.17826
GRIN1	-0.481266	-5.90466	-4.16316	5.32834e-05	0.000333792	1.10912
AKT3	-0.655066	-1.26918	-4.14926	5.6262e-05	0.000349562	1.05747
MME	0.869275	-3.20039	4.14165	5.7958e-05	0.000357172	1.02928
ACVRL1	-0.515947	-2.68245	-4.13248	6.00696e-05	0.000364628	0.995307
GZMH	-0.684008	-5.87643	-4.13222	6.013e-05	0.000364628	0.994354
ACVR1C	-0.679409	-5.71356	-4.09737	6.88462e-05	0.00041417	0.865929
CCL3L1	-0.783281	-2.16627	-4.07298	7.56527e-05	0.000451533	0.776545
HOXB3	0.944926	-1.77143	4.07017	7.64767e-05	0.000452886	0.766277
EYA2	0.955284	-3.37532	4.0597	7.96242e-05	0.000467869	0.728056
TLE3	-0.495682	1.56326	-4.05233	8.19146e-05	0.000477625	0.701187
CLEC5A	0.763526	-4.33763	4.02446	9.11499e-05	0.000527417	0.600012
CXADR	1.02573	-1.51778	4.01154	9.57622e-05	0.000549907	0.553284
HK2	0.562843	-1.06351	4.00277	9.90199e-05	0.000564339	0.521624
PIM1	-0.614769	-1.70125	-3.98103	0.000107554	0.000608401	0.443416
RBL2	-0.39066	0.975386	-3.9401	0.000125554	0.00070496	0.297134
ELK3	-0.49662	-1.53968	-3.92825	0.000131281	0.000731699	0.254992
CDKN1B	-0.605619	1.48307	-3.92446	0.000133166	0.000736786	0.241529
IL22RA2	-0.565997	-6.78993	-3.92011	0.00013536	0.000743499	0.226093
CLDN1	1.07699	-4.60711	3.91602	0.000137453	0.000749566	0.211601
CDC14A	-0.68408	-2.68396	-3.90362	0.000143987	0.000779585	0.167759
SNAI2	0.696059	-2.52392	3.88311	0.000155453	0.000835698	0.0954468
FLRT3	1.06379	-4.27895	3.87226	0.000161867	0.000864049	0.0573076
ANLN	0.712398	-1.18027	3.86293	0.000167582	0.000888304	0.0245796
FGFR2	0.91795	-2.11295	3.86013	0.000169332	0.000891347	0.0147839
TCF4	-0.500733	-1.08539	-3.8424	0.000180835	0.000944408	-0.0471712
HDAC1	-0.278501	0.624404	-3.84081	0.000181905	0.000944408	-0.05273
FOXC2	0.806982	-4.27543	3.83783	0.000183923	0.00094839	-0.0631279
PHGDH	0.869267	-0.962499	3.82814	0.00019062	0.000976284	-0.0968293
TNFAIP6	0.740582	-2.53124	3.82631	0.000191916	0.000976326	-0.103215
DKK2	-0.682289	-4.59541	-3.80935	0.000204292	0.00103235	-0.162071
CYBB	-0.549008	-0.508513	-3.80061	0.000210956	0.00105897	-0.192294
NUF2	0.537093	-4.12406	3.7972	0.000213616	0.00106527	-0.20409
ITPR1	-0.623712	-0.267924	-3.76079	0.00024404	0.00120903	-0.32937
DPT	-1.13587	0.108306	-3.73713	0.000265961	0.00130908	-0.410234
CDC25A	0.49442	-3.92908	3.70097	0.000303111	0.00148231	-0.533045
CMKLR1	-0.552007	-0.940127	-3.69096	0.000314231	0.00152684	-0.566864
ADAM12	-0.754168	-2.44093	-3.66681	0.000342666	0.0016544	-0.648135
JAM2	-0.591107	-3.36871	-3.65414	0.000358531	0.00172004	-0.690573
OGN	0.959007	-3.53049	3.6395	0.00037774	0.0018008	-0.739491
TP53	-0.335077	0.00730986	-3.63726	0.000380763	0.00180386	-0.74696
EIF2AK3	0.284421	-1.68428	3.63481	0.000384097	0.00180836	-0.755128
DLL1	-0.567576	-2.54831	-3.63114	0.000389142	0.0018208	-0.767355
CXCL10	-0.822755	-2.00353	-3.62395	0.000399213	0.00185646	-0.791289
FOSL1	0.630458	-4.46616	3.60559	0.000426035	0.00196911	-0.852177
VCAN	0.8289	1.1496	3.60348	0.000429214	0.00197178	-0.859135
MLLT3	-0.477895	-0.478621	-3.59306	0.000445302	0.00203337	-0.893571
LAG3	-0.504406	-3.84509	-3.58261	0.000462005	0.002097	-0.928021
GREM1	-1.02037	-3.21391	-3.55775	0.000504122	0.00226169	-1.0096
HLA.C	-0.459412	2.54561	-3.55768	0.000504256	0.00226169	-1.00985
GZMB	-0.676374	-4.07236	-3.54559	0.000526026	0.00234546	-1.04934
EP300	-0.244578	0.493201	-3.52525	0.000564673	0.00250305	-1.11556
THBS1	0.62737	1.31545	3.50826	0.00059899	0.00263973	-1.17063
WNT7B	0.705915	-3.05475	3.50229	0.000611493	0.00267926	-1.1899
TAP1	-0.491719	-0.670252	-3.50007	0.000616218	0.00267967	-1.19708
VIT	0.869632	-6.07222	3.49893	0.000618657	0.00267967	-1.20077
NUPR1	0.5133	1.99045	3.48951	0.000639123	0.00275259	-1.23113
CD84	-0.538366	-1.80025	-3.48787	0.00064276	0.00275261	-1.23642
CDH2	0.850213	-3.59436	3.48584	0.000647269	0.00275635	-1.24293
HLA.DRB1	-0.72742	2.19103	-3.48197	0.000655969	0.00276937	-1.25538
CD276	0.450815	0.529476	3.47879	0.000663202	0.00276937	-1.26561
B7.H3	0.450815	0.529476	3.47879	0.000663202	0.00276937	-1.26561
WDR77	-0.276181	-1.05144	-3.47803	0.000664941	0.00276937	-1.26805
AREG	-1.17588	-2.36609	-3.45129	0.0007289	0.00301916	-1.35362
NFATC1	-0.539086	-1.25902	-3.44631	0.000741427	0.00305436	-1.36949
EXO1	0.544679	-4.09493	3.43611	0.00076772	0.00314558	-1.40193
PCK1	1.29397	-5.33206	3.38165	0.000923598	0.00376391	-1.57383
IL11RA	-0.468553	-1.15893	-3.37363	0.000948911	0.00384639	-1.59894
INHBB	0.706763	-1.51311	3.32936	0.00110073	0.00443803	-1.73666
HOXA7	-0.633632	-5.38065	-3.32531	0.00111573	0.00447471	-1.74921
MT1G	0.64121	-0.52035	3.31893	0.00113969	0.00454676	-1.76891
ECM2	0.671887	-2.28783	3.31467	0.00115594	0.00458746	-1.78203
SP1	-0.306236	-0.384299	-3.30761	0.00118339	0.00467194	-1.80378
PARP1	-0.305024	0.353439	-3.30274	0.00120264	0.00471723	-1.81872
BAMBI	0.861857	-1.02943	3.30044	0.00121188	0.00471723	-1.82581
GPC4	0.686586	-2.26344	3.30002	0.00121354	0.00471723	-1.82707
JUN	-0.517822	0.582678	-3.2661	0.00135738	0.00524946	-1.93075
SERBP1	-0.20383	1.28005	-3.2349	0.00150359	0.00578538	-2.0253
CD44	-0.492086	0.705098	-3.22078	0.00157446	0.00602276	-2.06783
FSTL3	0.58522	-2.38916	3.21826	0.00158739	0.00602276	-2.07538
WNT5B	0.680155	-4.81976	3.21793	0.00158912	0.00602276	-2.07639
RBX1	-0.245547	0.54655	-3.20608	0.00165152	0.00622811	-2.11193
HIST1H1C	-0.36518	2.79281	-3.2019	0.00167407	0.00628192	-2.12444
MAP2K4	-0.402848	-0.0699211	-3.19275	0.00172442	0.00643898	-2.15177
LAMB3	0.788032	-3.37365	3.17842	0.00180608	0.00669232	-2.19442
RORB	0.465129	-6.01292	3.17776	0.00180993	0.00669232	-2.19638
FAM83D	0.579198	-3.12788	3.17407	0.00183159	0.00673953	-2.20734
BMP8A	0.738672	-3.86547	3.16327	0.00189636	0.00693816	-2.23935
CACNA2D3	-0.635968	-5.13394	-3.16204	0.00190388	0.00693816	-2.243
BNC2	-0.613558	-4.11048	-3.15723	0.00193351	0.00701244	-2.25722
PRKACB	-0.574043	-0.721266	-3.15433	0.00195158	0.00703828	-2.26578
BNIP3	0.425136	-1.11227	3.15311	0.0019592	0.00703828	-2.26937
FZD8	0.683006	-3.62269	3.14887	0.001986	0.00710089	-2.28187
ARID1A	-0.206564	0.141992	-3.1466	0.00200051	0.00711918	-2.28857
THBS2	0.815308	0.23817	3.12855	0.00211926	0.00750653	-2.34162
CKB	0.880258	-1.58561	3.11975	0.00217944	0.00768379	-2.36736
DEPDC1	0.385008	-3.50286	3.09761	0.00233809	0.00820496	-2.43191
KCNB1	0.555155	-5.70239	3.0875	0.00241402	0.00843237	-2.46125
JAG1	0.421751	-0.439497	3.06965	0.00255358	0.00887897	-2.51281
CRYAB	0.781069	-2.42491	3.06364	0.00260229	0.00900702	-2.53013
KDR	0.425542	-2.66399	3.02498	0.00293638	0.0101172	-2.64076
XRCC2	0.427766	-4.00996	3.01454	0.00303311	0.0103588	-2.67041
PSAT1	0.590889	-3.79933	3.01447	0.00303385	0.0103588	-2.67064
COL4A6	-0.448302	-4.80677	-3.00997	0.00307644	0.0104571	-2.68339
MED1	-0.336073	-1.25864	-3.00531	0.00312117	0.0105618	-2.69658
SOCS3	-0.613665	-1.59567	-2.99883	0.00318426	0.0106156	-2.71488
EYA4	0.652415	-5.87402	2.99771	0.00319534	0.0106156	-2.71805
EFNA3	0.6008	-2.99175	2.99729	0.00319952	0.0106156	-2.71924
BMP7	0.868146	-4.93889	2.99699	0.00320248	0.0106156	-2.72009
ICAM1	-0.442397	-1.09828	-2.99652	0.00320707	0.0106156	-2.7214
NEO1	0.333128	-1.08319	2.98421	0.00333117	0.0109784	-2.75608
PLA2G2A	1.156	-4.10674	2.97591	0.0034173	0.0112135	-2.77939
PRKACA	0.203122	-0.572778	2.97066	0.00347288	0.0113141	-2.79411
BMP6	-0.512311	-3.80379	-2.96978	0.00348231	0.0113141	-2.79659
BLVRA	-0.364295	-1.32508	-2.96816	0.00349964	0.0113141	-2.80112
PPP2R1A	-0.20216	1.7581	-2.96741	0.00350767	0.0113141	-2.80321
RBL1	-0.301772	-2.16637	-2.96552	0.00352801	0.0113315	-2.80848
SFN	0.718173	-2.51148	2.9615	0.0035718	0.0114237	-2.81974
RNASE2	0.59604	-5.45364	2.95775	0.00361293	0.0115067	-2.83018
E2F1	0.402502	-2.8658	2.94871	0.00371413	0.0117795	-2.85537
CLDN3	0.535785	-2.89115	2.94722	0.00373103	0.0117838	-2.85951
GHR	0.605045	-3.14586	2.93055	0.00392532	0.012329	-2.90576
IL1B	-0.560111	-3.05826	-2.92964	0.00393616	0.012329	-2.90827
CDKN1A	0.468335	-1.43907	2.91614	0.00410067	0.0127914	-2.94554
MAPK1	-0.214292	0.961724	-2.90862	0.00419501	0.013032	-2.96624
FUT3	0.76135	-3.30426	2.89357	0.00438972	0.0135813	-3.00749
OLFML2B	0.758866	-1.03011	2.88879	0.00445337	0.0137222	-3.02057
TMEM45B	0.732856	-3.36059	2.86359	0.00480262	0.0147384	-3.08913
FGF2	-0.570553	-2.38764	-2.85909	0.00486757	0.0148775	-3.10132
FOXC1	0.903319	-2.2016	2.85008	0.00500011	0.0152212	-3.12568
PKMYT1	0.509838	-2.72716	2.84345	0.00509971	0.0154623	-3.14356
CKMT1A	0.759336	-3.10709	2.83518	0.00522637	0.0157832	-3.1658
DKK1	0.615739	-5.20499	2.83156	0.00528284	0.0158904	-3.17553
ADD1	-0.207765	0.534802	-2.8292	0.00531988	0.0159143	-3.18186
PTGER3	-0.77663	-2.24945	-2.82838	0.00533277	0.0159143	-3.18405
RB1	-0.221194	-0.882212	-2.82125	0.00544633	0.0161895	-3.20313
PRC1	0.395525	-2.05478	2.81295	0.00558148	0.0165264	-3.22531
PPARG	0.425381	-2.99309	2.81032	0.00562494	0.0165903	-3.23233
CHAD	1.23393	-3.31096	2.80168	0.00576966	0.0168874	-3.25531
HDAC10	-0.288258	-1.20553	-2.80165	0.00577022	0.0168874	-3.2554
CHI3L1	0.823761	-4.60429	2.7902	0.00596745	0.0173974	-3.28577
SPRY4	0.413946	-2.37573	2.78283	0.00609754	0.0177024	-3.30526
FAM214A	-0.405642	-0.539423	-2.78118	0.00612711	0.0177024	-3.30963
RRM2	0.457485	-0.304975	2.78034	0.00614213	0.0177024	-3.31184
AXIN2	-0.42656	-3.2537	-2.77422	0.00625287	0.0179533	-3.32797
TMPRSS2	0.691368	-2.7554	2.76917	0.00634569	0.0181511	-3.34127
GADD45B	-0.343976	-0.621045	-2.76638	0.00639743	0.0182303	-3.3486
GADD45A	-0.41265	0.308762	-2.76427	0.00643697	0.0182743	-3.35416
HEMK1	-0.323807	-1.04638	-2.75503	0.00661215	0.0187015	-3.37838
POPDC3	0.596837	-6.65607	2.74961	0.00671694	0.0189273	-3.39255
FOXM1	0.460791	-3.01908	2.71915	0.00733454	0.0205911	-3.47177
SELE	-0.533763	-4.08683	-2.71452	0.0074327	0.0207896	-3.48373
NRCAM	-0.712035	-4.74905	-2.70611	0.0076143	0.0212193	-3.50543
CXCL12	-0.637269	-0.0697843	-2.7006	0.00773543	0.0214779	-3.51962
BCL6B	0.355392	-3.51725	2.69529	0.0078538	0.0217269	-3.53326
PGK1	0.265012	1.31685	2.68658	0.00805137	0.0221785	-3.55558
TNFSF10	0.515875	0.83865	2.68553	0.00807556	0.0221785	-3.55827
EYA1	0.62603	-5.37649	2.67724	0.00826821	0.0226256	-3.57943
IFT140	0.367278	-1.3514	2.66605	0.0085353	0.0232725	-3.60795
RAC3	0.39694	-1.84276	2.66049	0.00867073	0.023557	-3.62206
PDK4	-0.602837	-0.988139	-2.65844	0.00872117	0.0236095	-3.62726
CDC14B	0.361934	-2.43571	2.648	0.00898217	0.0242295	-3.65367
SMAD3	-0.33038	-1.31827	-2.63931	0.00920472	0.0247418	-3.67559
TNKS2	-0.22433	0.626181	-2.63596	0.00929186	0.0248198	-3.68402
KIF2C	0.384657	-3.42199	2.63568	0.00929925	0.0248198	-3.68473
FANCF	-0.207639	-2.19629	-2.62579	0.00956102	0.025429	-3.70956
RPS6KA5	-0.303221	-3.10542	-2.60751	0.0100623	0.0266685	-3.75523
SKP1	-0.250765	2.25584	-2.60386	0.0101651	0.0268473	-3.76431
SMAD1	-0.223367	-1.88194	-2.57705	0.0109505	0.0288211	-3.83069
RASAL1	0.507285	-5.9055	2.57203	0.0111036	0.0291228	-3.84306
RASGRF1	-0.598412	-4.63373	-2.56811	0.0112244	0.0293381	-3.8527
FXYD3	0.482229	1.65471	2.56475	0.0113287	0.0295091	-3.86094
EGLN2	-0.2919	0.17191	-2.55792	0.0115436	0.029966	-3.87767
CENPF	0.437831	-2.05721	2.54304	0.0120249	0.031102	-3.914
GATA4	0.694006	-6.40277	2.54187	0.0120633	0.031102	-3.91683
CLEC14A	0.395988	-2.42147	2.52532	0.0126213	0.0324303	-3.957
DTX4	0.472504	-3.13186	2.51538	0.0129673	0.0332069	-3.98101
LEP	-0.441862	-6.73064	-2.50844	0.0132137	0.0337238	-3.9977
TRIP13	0.383128	-3.9427	2.49959	0.0135341	0.0344256	-4.01893
CDC25C	0.363632	-5.27215	2.49281	0.0137846	0.0349047	-4.03518
ADM	0.524331	-2.72211	2.492	0.0138145	0.0349047	-4.0371
HOXB13	0.569738	-5.94737	2.48335	0.0141405	0.0356096	-4.05775
GDF5	-0.4301	-6.32087	-2.48016	0.0142625	0.0357978	-4.06535
SMO	0.377489	-3.59427	2.47764	0.0143593	0.0358643	-4.07134
TUBA4A	-0.431986	-2.60002	-2.47626	0.0144127	0.0358643	-4.07462
MRE11	-0.195479	-1.26753	-2.47579	0.0144309	0.0358643	-4.07573
KAT2B	-0.319336	-1.43834	-2.46288	0.0149388	0.0370054	-4.10631
COLEC12	0.509187	-2.78135	2.45285	0.0153444	0.0378863	-4.12997
KIF23	0.375512	-1.97676	2.44661	0.015602	0.0382904	-4.14466
CLDN7	0.389975	-1.72538	2.44644	0.0156091	0.0382904	-4.14507
PGR	-0.900732	-3.28593	-2.44505	0.0156669	0.038308	-4.14833
VEGFD	-0.460899	-5.25073	-2.43793	0.0159661	0.0389142	-4.16501
PLCE1	0.549768	-4.4882	2.43581	0.0160566	0.0389367	-4.17
MYCN	0.632526	-4.22691	2.4353	0.0160781	0.0389367	-4.17118
PECAM1	-0.31755	0.040893	-2.43125	0.0162518	0.0392321	-4.18065
ITGB1	0.220598	1.58866	2.428	0.0163924	0.0394447	-4.18824
CEACAM5	1.07643	-3.76699	2.42681	0.016444	0.0394447	-4.19101
KIFC1	0.395773	-1.38026	2.42355	0.0165863	0.0396607	-4.1986
GRB7	0.535056	-1.51006	2.41768	0.0168459	0.0401548	-4.21227
CDCA5	0.399008	-3.48446	2.40619	0.0173635	0.0412588	-4.2389
SRPX	0.587659	-4.22568	2.40435	0.0174481	0.0412713	-4.24318
MUC1	0.716958	2.84961	2.4037	0.0174777	0.0412713	-4.24467
TSPAN1	0.824658	-2.06808	2.39834	0.0177257	0.0417269	-4.25705
TAPBP	-0.222515	0.354037	-2.39373	0.0179414	0.0421039	-4.26768
CHIT1	-0.563284	-5.70481	-2.38672	0.0182734	0.0427481	-4.28378
ITGB6	0.625769	-2.24697	2.38557	0.0183287	0.0427481	-4.28644
LEPR	0.532327	-1.96817	2.3776	0.018714	0.043513	-4.3047
FGF9	-0.340497	-4.76515	-2.3761	0.0187874	0.04355	-4.30813
COMP	0.795971	-1.48022	2.36663	0.0192562	0.0445007	-4.32974
WNT11	-0.523659	-3.25079	-2.34704	0.020259	0.0465378	-4.3742
IL12RB2	-0.430196	-4.54283	-2.34655	0.0202849	0.0465378	-4.37532
WNT6	-0.33062	-5.39159	-2.34523	0.0203541	0.0465378	-4.3783
FBN1	0.498629	-0.965141	2.34468	0.0203833	0.0465378	-4.37955
NUMBL	0.233655	-2.83631	2.33214	0.0210525	0.0479214	-4.4078
HIST3H2BB	-0.325239	-0.250447	-2.32429	0.0214815	0.048672	-4.42542
TBC1D9	-0.533226	1.26175	-2.32376	0.0215107	0.048672	-4.42661
NOTCH1	0.265584	-1.73369	2.31533	0.0219802	0.0495862	-4.44545
TWIST1	0.494925	-3.35422	2.31409	0.0220503	0.0495968	-4.44823
BAD	0.243079	-1.01651	2.31164	0.0221886	0.0496603	-4.45368
VIM	-0.351208	4.75012	-2.31127	0.0222096	0.0496603	-4.45451
ZBTB16	-0.595711	-3.27717	-2.30894	0.0223423	0.0498055	-4.4597
SFRP1	-0.72436	-2.22144	-2.30783	0.0224059	0.0498055	-4.46218
